# Supplementary material for: Fungal mycelium classified in different material families based on glycerol treatment
Source: Springer Nature journal article supplement (doi:10.1038/s42003-020-1064-4), 2020-06-26
Supplement: 42003_2020_1064_MOESM1_ESM.pdf [file 42003_2020_1064_MOESM1_ESM.pdf]

## Supplementary Information

### Fungal mycelium classified in different material families based on glycerol treatment

Freek VW Appels, Jeroen G van den Brandhof, Jan Dijksterhuis, Gijs W de Kort, Han AB Wösten

#### Supplementary Figures

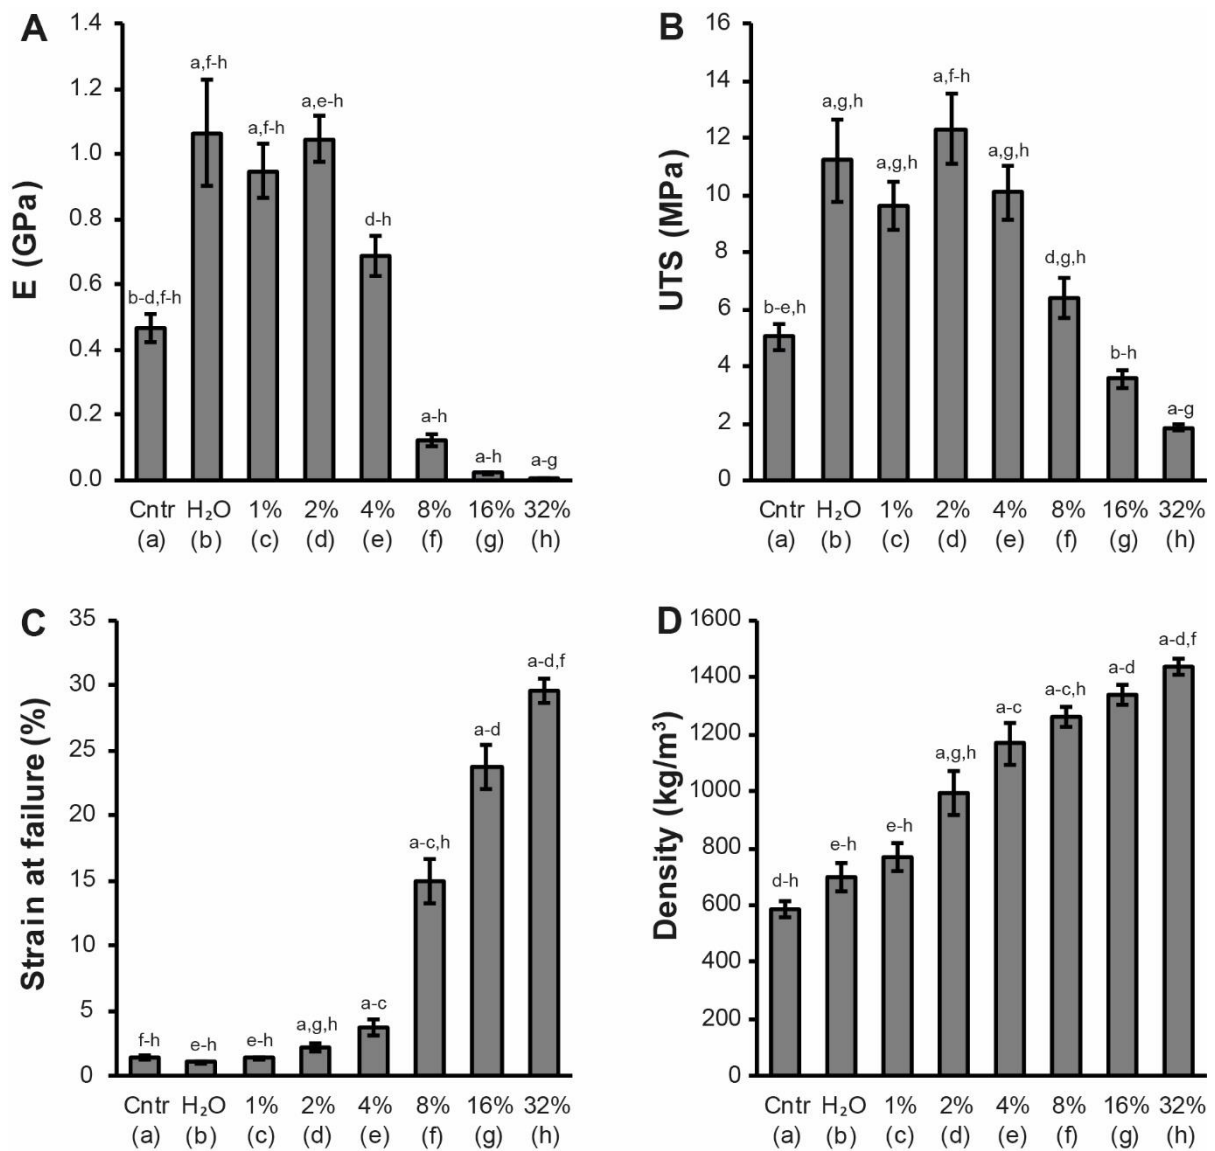

**Supplementary Figure 1.** Material properties of mycelial films of *S. commune*. Young's modulus (E) (A), ultimate tensile strength ( $\sigma$ ) (B), strain at failure ( $\epsilon$ ) (C) and density (D) of *S. commune* mycelium films treated with 0–32% glycerol, untreated mycelium films serving as a control. Letters above bars indicate statistically significant differences to the materials specified with that letter as was determined by a Welch's *t*-test followed by a Games-Howell post hoc test ( $p \leq 0.05$ ). The number of biological replicates per treatment is shown in Table 1. Bars represent mean  $\pm$  SEM.

## Supplementary Tables

**Supplementary Table 1. Thickness increase resulting from water submersion of mycelial films of *S. commune*.** Thickness increase of mycelium films of *S. commune* treated with water or different concentrations of glycerol after 24 hours water submersion (mean  $\pm$  SEM,  $n=4$ ).

|                  | Thickness increase |
|------------------|--------------------|
| Control          | 102 $\pm$ 8%       |
| H <sub>2</sub> O | 493 $\pm$ 33%      |
| 1% glyc          | 496 $\pm$ 16%      |
| 2% glyc          | 472 $\pm$ 55%      |
| 4% glyc          | 450 $\pm$ 21%      |
| 8% glyc          | 331 $\pm$ 17%      |
| 16% glyc         | 277 $\pm$ 18%      |
| 32% glyc         | 189 $\pm$ 19%      |
