# Supplementary material for: Fungal mycelium classified in different material families based on glycerol treatment
Source: Springer Nature journal article supplement (doi:10.1038/s42003-020-1064-4), 2020-06-26
Supplement: 42003_2020_1064_MOESM3_ESM.pdf [file 42003_2020_1064_MOESM3_ESM.pdf]

## Description of Additional Supplementary Files

**File Name:** Supplementary Data 1

**Description:** Datasets of this study
